# Supplementary material
Source: Springer Nature journal article supplement (https://www.springerprofessional.de/resource/supplementary/13673_2012_41_MOESM5_ESM.pdf/11899370)

### User Vs Time Taken for each Login

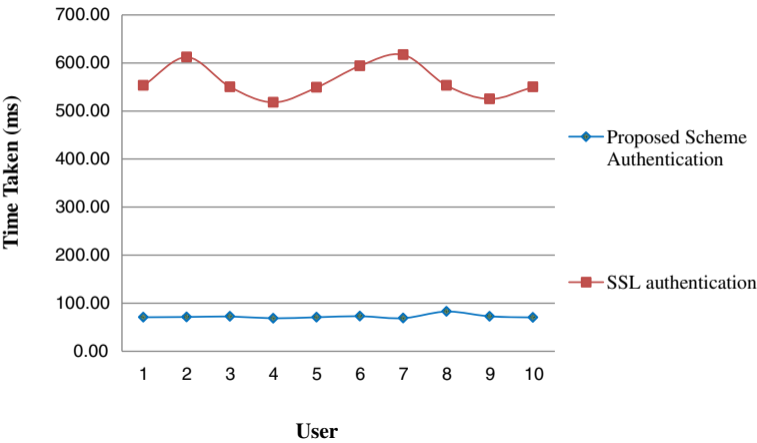

Supplement: MOESM5 [file 11899370]
